# Supplementary material for: Circulating small extracellular vesicles increase after an acute bout of moderate-intensity exercise in pregnant compared to non-pregnant women
Source: PubMed Central journal article supplement (PMC8209031; doi:10.1038/s41598-021-92180-5), 2021-06-16
Supplement: 41598_2021_92180_MOESM1_ESM.pdf [file 41598_2021_92180_MOESM1_ESM.pdf]

**Pregnant**

**Non-pregnant**

Pre Post Pre Post Pre Post Pre Post Pre Post

250 kDa —  
150 kDa —  
100 kDa —  
75 kDa —  
50 kDa —  
37 kDa —  
25 kDa —  
20 kDa —

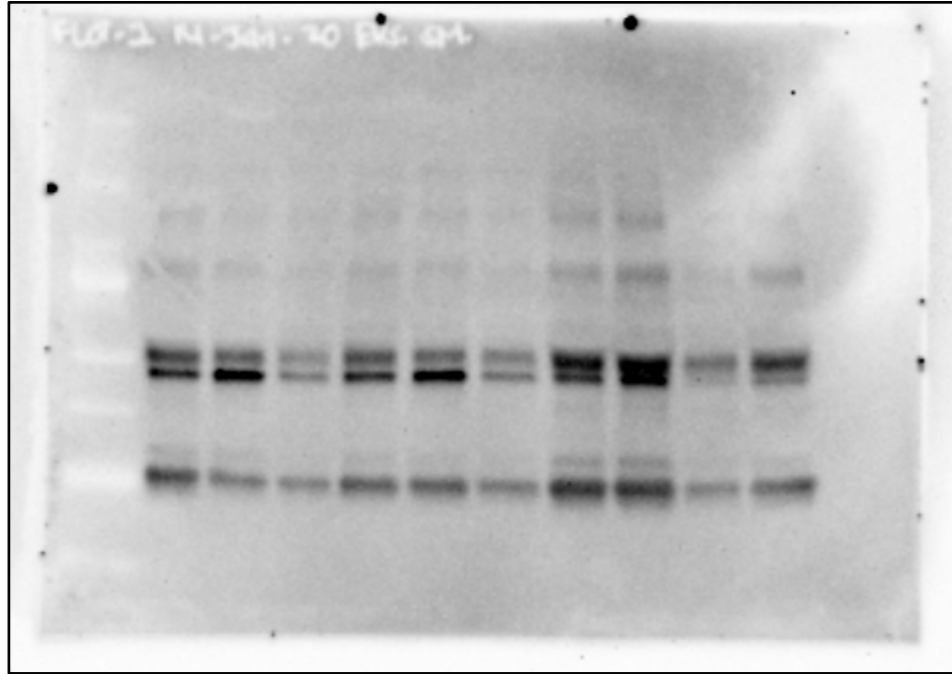

**FLOT1**  
~48 kDa

**Pregnant**

**Non-pregnant**

Pre Post Pre Post Pre Post Pre Post Pre Post

250 kDa —  
150 kDa —  
100 kDa —  
75 kDa —  
50 kDa —  
37 kDa —  
25 kDa —  
20 kDa —

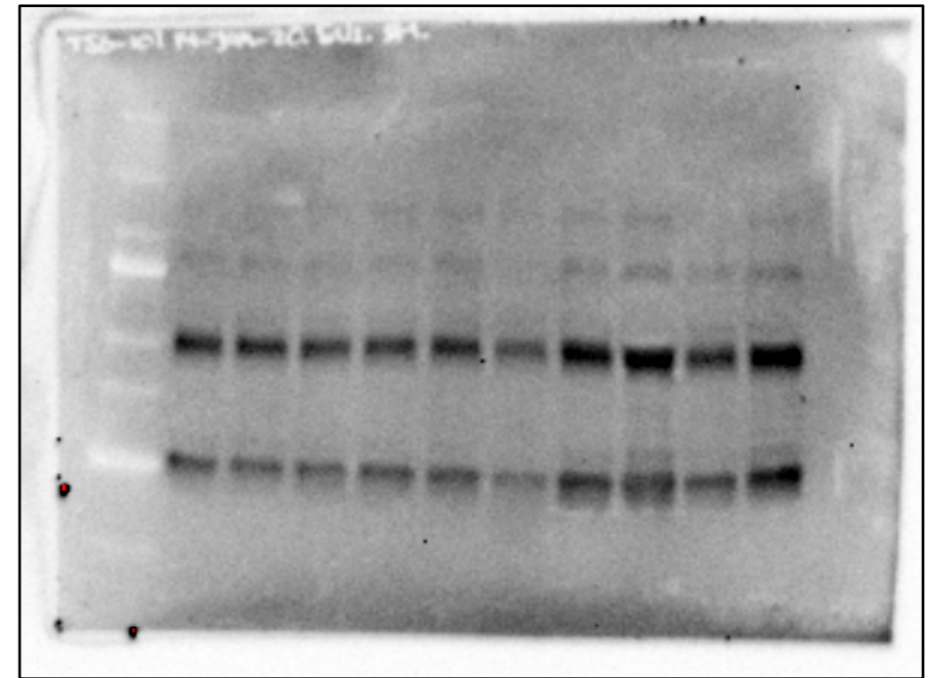

**TSG101**  
~47 kDa

**Pregnant Non-pregnant**

Pre Post Pre Post BeWo Placenta

250 kDa —  
150 kDa —  
100 kDa —  
75 kDa —  
50 kDa —  
37 kDa —  
25 kDa —  
20 kDa —

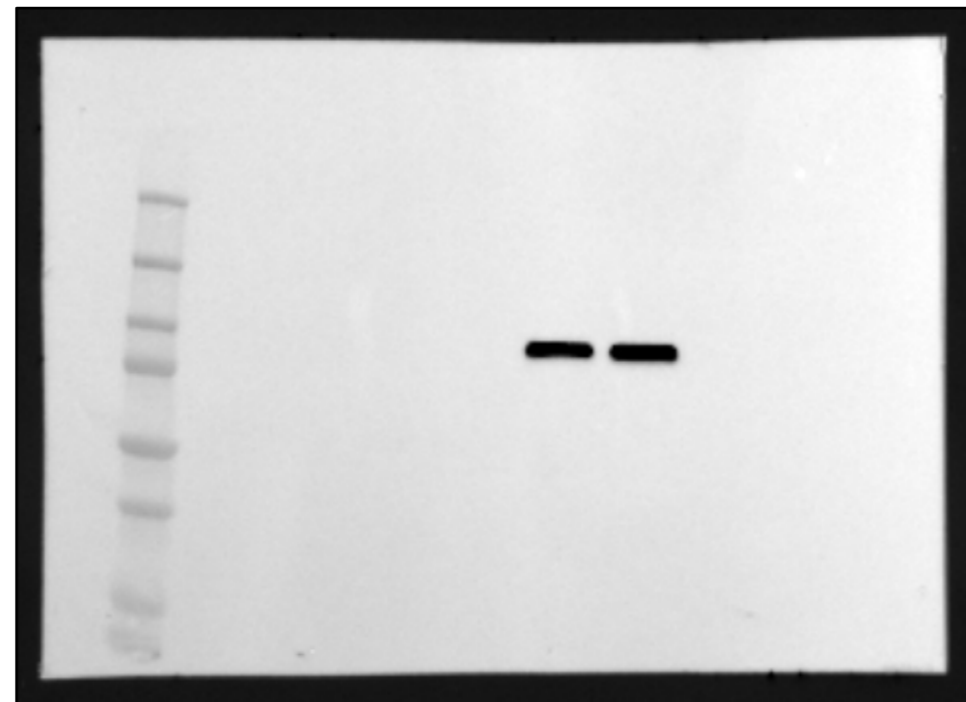

**Calnexin**  
~70 kDa
